# Supplementary material for: Integrated Transcriptomic Analysis Reveals Distinct Immune Response Signatures and Prognostic Biomarkers in SARS-CoV-2 Infection
Source: Research Square preprint supplement (doi:10.21203/rs.3.rs-8462034/v1), 2026-01-28
Supplement: Supplementary file 1 [file 77cff2b8937c357f05a16075.xlsx]

## Sheet: GO_BP_upregulated
Table S2. Enrichment results of upregulated DEGs in PBMCs (Omicron vs healthy controls).
Gene_set	Term	Overlap	P-value	Adjusted P-value	Old P-value	Old Adjusted P-value	Odds Ratio	Combined Score	Genes
GO_Biological_Process_2023	Defense Response To Symbiont (GO:0140546)	49/148	7.80233e-19	1.79256e-15	0	0	5.95238	248.183	IFITM3;RTP4;IFITM1;IFIT5;DDX60L;IFIT1;IFI44L;IFIT3;IFIT2;OASL;IFIH1;TBK1;TRIM5;IKBKE;RSAD2;RIPK3;RNASE2;RNASE1;NT5C3A;PLSCR1;AIM2;IFI27;OAS1;OAS2;OAS3;PLA2G10;IFIT1B;IRF7;TLR7;IFI6;DDX60;IFI16;MICA;APOBEC3C;APOBEC3F;STAT1;MX2;STAT2;MX1;EIF2AK2;ISG15;LILRB1;BST2;ISG20;MOV10;TBKBP1;APOBEC3A;MYD88;APOBEC3B
GO_Biological_Process_2023	Defense Response To Virus (GO:0051607)	56/189	8.95832e-19	1.79256e-15	0	0	5.07761	211.008	IFITM3;RTP4;IFITM1;IFIT5;DDX60L;IFIT1;IFI44L;IFIT3;IFIT2;OASL;IFIH1;TRIM6;TBK1;TRIM5;DHX58;TRIM26;TRIM21;IKBKE;RSAD2;RIPK3;RNASE2;RNASE1;NT5C3A;PLSCR1;AIM2;IFI27;OAS1;OAS2;OAS3;PLA2G10;IFIT1B;IRF7;TLR7;IFI6;DDX60;USP18;IFI16;MICA;APOBEC3C;APOBEC3F;STAT1;MX2;STAT2;MX1;EIF2AK2;ISG15;LILRB1;PML;BST2;ISG20;CXCL10;MOV10;TBKBP1;APOBEC3A;MYD88;APOBEC3B
GO_Biological_Process_2023	Negative Regulation Of Viral Process (GO:0048525)	28/61	1.42458e-15	1.90038e-12	0	0	10.1016	345.324	IFITM3;IFITM1;IFIT5;UBP1;ZC3HAV1;IFIT1;OASL;IFIH1;TRIM6;ZFP36;IFI16;TRIM21;APOBEC3C;APOBEC3F;RSAD2;STAT1;MX1;EIF2AK2;ISG15;BST2;ISG20;PLSCR1;OAS1;TNIP1;OAS2;OAS3;TRIM14;APOBEC3A
GO_Biological_Process_2023	Negative Regulation Of Viral Genome Replication (GO:0045071)	24/53	2.21129e-13	2.2124e-10	0	0	9.82952	286.433	IFITM3;APOBEC3C;IFITM1;APOBEC3F;RSAD2;MX1;IFIT5;EIF2AK2;ISG15;ZC3HAV1;IFIT1;OASL;IFIH1;BST2;ISG20;TRIM6;PLSCR1;OAS1;IFI16;TNIP1;OAS2;OAS3;APOBEC3A;APOBEC3B
GO_Biological_Process_2023	Regulation Of Viral Genome Replication (GO:0045069)	24/67	9.3852e-11	7.51191e-08	0	0	6.62417	152.947	IFITM3;APOBEC3C;IFITM1;APOBEC3F;RSAD2;MX1;IFIT5;EIF2AK2;RAD23A;ISG15;ZC3HAV1;IFIT1;OASL;IFIH1;BST2;ISG20;TRIM6;PLSCR1;OAS1;IFI16;TNIP1;OAS2;OAS3;APOBEC3A
GO_Biological_Process_2023	Response To Cytokine (GO:0034097)	30/125	2.50083e-08	1.66805e-05	0	0	3.75182	65.672	IFITM3;CD274;ITIH4;IFITM1;SP100;SRC;ADAR;RELB;NUB1;IRAK1;IRAK2;KHSRP;LAMP3;LGALS9;TIMP1;JAK2;TRIM21;IKBKE;GCH1;STAT1;SPHK1;MX2;MX1;EIF2AK2;ISG15;PML;BST2;PLSCR1;XAF1;MYD88
GO_Biological_Process_2023	Regulation Of DNA Binding (GO:0051101)	17/48	6.23778e-08	3.56623e-05	0	0	6.48337	107.56	CDT1;FOXC1;SP100;JUN;TGFB1;CEBPG;DOT1L;HJURP;MMP8;MMP9;SIRT2;NFKBIA;IFI16;SUMO3;E2F1;JAK2;ZBTB7A
GO_Biological_Process_2023	Positive Regulation Of I-kappaB kinase/NF-kappaB Signaling (GO:0043123)	34/175	7.21899e-07	0.000315166	0	0	2.8651	40.5165	RNF31;SLC35B2;ECM1;IFIT5;EDA2R;TRIM6;LGALS1;TBK1;IRAK1;TRIM5;NUP62;TNFSF10;FLNA;LGALS9;TRIM21;IKBKE;TRIM22;BRD4;SHISA5;MIB2;TRAF2;TICAM1;JMJD8;BST2;TAB3;TERF2IP;TAB2;RBCK1;LTBR;TRIM38;CC2D1A;MYD88;TMEM106A;TRIM34
GO_Biological_Process_2023	Positive Regulation Of DNA-templated Transcription (GO:0045893)	145/1243	7.59748e-07	0.000315166	0	0	1.60255	22.5803	CCNK;SPI1;KDM1B;FHOD1;UBP1;RORB;GPATCH3;DCAF6;IL4I1;TBK1;HMGN5;ZMIZ1;SOX15;ZMIZ2;ZC3H12A;CREB3L2;CAPN3;EP300;JUNB;HMGN1;MEF2A;MAP2K2;GTF2F1;RNF40;HCFC1;ATF7;PRKD2;ATF3;KMT2E;KMT2D;CASZ1;AKNA;KMT2B;PIK3R2;SLC9A1;HELZ2;SBNO2;DEAF1;DVL2;DVL3;HIVEP3;CAMTA2;PPARGC1B;ZBTB17;NFE2;JUN;TGFB1;JUP;ALYREF;ESRRB;SMARCA5;HMGA1;LIF;GLMP;POU2F2;FLI1;SMARCA4;COL1A1;NFKBIA;MLLT10;CXCL10;DAB2;FUBP3;TADA3;NFE2L1;RNF…
GO_Biological_Process_2023	Response To Interferon-Beta (GO:0035456)	2025-12-29	7.87522e-07	0.000315166	0	0	8.32498	117.002	IFITM3;BST2;IFITM1;TRIM6;PLSCR1;PNPT1;AIM2;IFI16;OAS1;STAT1;XAF1;IKBKE
GO_Biological_Process_2023	Regulation Of Cell Cycle (GO:0051726)	48/298	1.51546e-06	0.000551351	0	0	2.28851	30.6656	RB1;PPP1R15A;CDKN1A;CCNF;BRCA1;PPP1R9B;TNFSF13B;CDC20;TGM1;CDC27;CHEK1;ZNF703;TP53BP2;NBN;BRD7;MARK4;JUNB;TRIM21;DLGAP5;MAP2K6;PHACTR4;CDT1;ZBTB17;JUN;CDK11A;PNPT1;TGFB1;GADD45B;MX2;PLK1;PTK6;LILRB1;DHCR24;RAD23A;YY1AP1;SIRT2;RNF40;HCFC1;GADD45G;YEATS2;TADA3;TTLL12;CALR;NUPR1;EVI2B;PRR11;MCM2;SMIM22
GO_Biological_Process_2023	Microtubule Cytoskeleton Organization Involved In Mitosis (GO:1902850)	17/59	1.77347e-06	0.000591452	0	0	4.78249	63.3324	STIL;MAP1S;PLK1;CDCA8;TTK;KIF11;WDR62;TUBG1;NDC80;CENPE;ESPL1;KIF4A;NUSAP1;CDK1;BIRC5;DLGAP5;SPC25
GO_Biological_Process_2023	Regulation Of I-kappaB kinase/NF-kappaB Signaling (GO:0043122)	40/232	1.99561e-06	0.000603791	0	0	2.47812	32.5242	RNF31;SLC35B2;ECM1;IFIT5;EDA2R;TRIM6;LGALS1;TBK1;IRAK1;TRIM5;ZC3H12A;NUP62;TNFSF10;FLNA;CAPN3;LGALS9;TRIM21;IKBKE;TRIM22;BRD4;STAT1;MIB2;SHISA5;TRAF2;TICAM1;JMJD8;LILRB4;BST2;TNIP1;TAB3;TERF2IP;TAB2;RBCK1;LTBR;TRIM38;CACTIN;CC2D1A;TMEM106A;MYD88;TRIM34
GO_Biological_Process_2023	DNA Integrity Checkpoint Signaling (GO:0031570)	14/42	2.11221e-06	0.000603791	0	0	5.9009	77.1116	CDT1;DTX3L;DOT1L;CDC6;PARP9;CDC45;CHEK1;RPA4;E2F1;TIMELESS;FBXO6;CLSPN;NBN;RAD9A
GO_Biological_Process_2023	Interleukin-27-Mediated Signaling Pathway (GO:0070106)	2025-05-05	2.99167e-06	0.000798178	0	0	92135	1.17193e+06	OAS1;OAS2;STAT1;MX1;OASL
GO_Biological_Process_2023	Cellular Response To Type I Interferon (GO:0071357)	13/38	3.50582e-06	0.000876894	0	0	6.134	77.0497	IFITM3;IFITM1;SP100;STAT1;STAT2;IFIT1;TBK1;IRAK1;IFI27;OAS2;TBKBP1;IKBKE;MYD88
GO_Biological_Process_2023	Regulation Of Viral Entry Into Host Cell (GO:0046596)	14/44	3.95519e-06	0.00088654	0	0	5.50691	68.5086	FCN1;IFITM3;IFITM1;TMPRSS2;TRIM6;LGALS1;TRIM5;TRIM26;LGALS9;TRIM38;TRIM21;TRIM22;LY6E;TRIM34
GO_Biological_Process_2023	Positive Regulation Of Cell Cycle Process (GO:0090068)	25/118	4.16083e-06	0.00088654	0	0	3.18378	39.4464	KIF14;CDCA8;NCAPG;WIZ;SMC5;SMC6;DBF4B;NCAPH;SOX15;NUP62;NUSAP1;E2F7;E2F8;PDGFRB;PLK4;STIL;PRKCE;NCAPH2;KIF23;CDC6;NDC80;SIRT2;CIT;PLSCR1;BIRC5
GO_Biological_Process_2023	Regulation Of Chromosome Segregation (GO:0051983)	2025-11-28	4.20896e-06	0.00088654	0	0	7.62635	94.4012	RMI2;CDCA2;NCAPH2;NCAPG;SMC5;C9ORF78;SMC6;CDC6;MKI67;BUB1;NCAPH
GO_Biological_Process_2023	Positive Regulation Of Transcription By RNA Polymerase II (GO:0045944)	112/938	5.06155e-06	0.00101282	0	0	1.63352	19.9189	CCNK;SPI1;KDM1B;FHOD1;ZMYND8;UBP1;RORB;DCAF6;IL4I1;TBK1;ZMIZ1;SOX15;ZMIZ2;ZC3H12A;EP300;JUNB;MEF2A;GTF2F1;RNF40;HCFC1;ATF7;PRKD2;ATF3;KMT2D;CASZ1;AKNA;PIK3R2;SLC9A1;HELZ2;SBNO2;DVL2;DVL3;CAMTA2;PPARGC1B;ZBTB17;JUN;TGFB1;JUP;ESRRB;SMARCA5;HMGA1;LIF;GLMP;POU2F2;SMARCA4;NFKBIA;MLLT10;CXCL10;DAB2;FUBP3;NFE2L1;ACVRL1;BMPR2;BRCA1;MED16;MED15;HYAL2;MYBL2;INSL3;KLF10;SS18;SREBF1;FOXD2;NCOA6;NCOA3;TFEB;VE…

## Sheet: KEGG_pathways
Gene_set	Term	Overlap	P-value	Adjusted P-value	Old P-value	Old Adjusted P-value	Odds Ratio	Combined Score	Genes
KEGG_2021_Human	Cell cycle	30/124	2.05329e-08	6.07773e-06	0	0	3.79194	67.122	RB1;CDKN1A;BUB1B;TTK;PKMYT1;CDC20;CCNB2;CDC45;PTTG1;CDC27;CHEK1;E2F1;EP300;E2F2;E2F4;BUB1;ZBTB17;TGFB1;GADD45B;PLK1;CDC6;CDC25A;GADD45G;CCNA2;CCNA1;ESPL1;CDK1;MCM4;MCM5;MCM2
KEGG_2021_Human	Epstein-Barr virus infection	40/202	4.54431e-08	6.72558e-06	0	0	2.94186	49.7375	RB1;CDKN1A;PIK3R2;ITGAL;RELB;TBK1;IRAK1;E2F1;E2F2;IKBKE;MAP2K6;JUN;GADD45B;STAT1;DDX58;STAT2;ADRM1;TAP2;EIF2AK2;TAP1;ISG15;TRAF2;GADD45G;SAP30;NCOR2;NFKBIA;CCNA2;CXCL10;CCNA1;OAS1;OAS2;OAS3;BTK;IRF7;BAX;TAB2;CALR;NFKBIE;MYD88;IRF9
KEGG_2021_Human	Hepatitis B	34/162	1.06217e-07	1.048e-05	0	0	3.15833	50.7158	RB1;CDKN1A;ATF6B;SRC;PIK3R2;IFIH1;TBK1;IRAK1;CREB3L2;E2F1;EP300;E2F2;PTK2B;JAK2;IKBKE;MAP2K6;JUN;MAP2K2;TGFB1;DDX58;STAT1;STAT2;FOS;TICAM1;MMP9;NFKBIA;CCNA2;CCNA1;IRF7;BIRC5;BAX;TAB2;SOS1;MYD88
KEGG_2021_Human	Hepatitis C	30/157	4.5283e-06	0.000335094	0	0	2.80158	34.4739	RB1;CDKN1A;PIK3R2;IFIT1;TBK1;E2F1;E2F2;IKBKE;LDLR;MAP2K2;RSAD2;DDX58;STAT1;MX2;STAT2;MX1;EIF2AK2;TRAF2;TICAM1;NFKBIA;CXCL10;OAS1;OAS2;OAS3;IFIT1B;IRF7;CLDN18;BAX;SOS1;IRF9
KEGG_2021_Human	Influenza A	31/172	1.09849e-05	0.000593491	0	0	2.60722	29.7718	NXT1;TMPRSS2;PIK3R2;ADAR;IFIH1;TBK1;TNFSF10;EP300;CCL2;JAK2;IKBKE;MAP2K2;RSAD2;DDX58;STAT1;MX2;STAT2;MX1;EIF2AK2;TICAM1;PML;NFKBIA;CXCL10;OAS1;OAS2;OAS3;IRF7;BAX;TLR7;MYD88;IRF9
KEGG_2021_Human	NOD-like receptor signaling pathway	32/181	1.20302e-05	0.000593491	0	0	2.54736	28.8567	RNF31;TRPM2;TBK1;CASP5;IFI16;CCL2;IKBKE;GBP1;GBP4;JUN;RIPK3;STAT1;STAT2;PRKCD;CARD6;CYBA;TRAF2;TICAM1;NFKBIA;PLCB3;AIM2;OAS1;OAS2;OAS3;CARD17;IRF7;TAB3;TAB2;RBCK1;PKN1;MYD88;IRF9
KEGG_2021_Human	Lysosome	25/128	1.86111e-05	0.000786982	0	0	2.87311	31.2932	SCARB2;IDUA;CTSZ;GBA;CTSO;NAGLU;CTSL;LAMP3;HYAL2;NEU1;AP1S1;ACP2;CTSD;CTSA;ABCA2;AP1B1;AP3D1;MCOLN1;PLA2G15;GALNS;MAN2B1;TPP1;CD68;ATP6V0C;LGMN
KEGG_2021_Human	Human immunodeficiency virus 1 infection	35/212	2.23163e-05	0.000825703	0	0	2.3464	25.1304	PIK3R2;GNAI2;CCNB2;TBK1;IRAK1;TRIM5;GNA11;CHEK1;RAC2;AP1S1;RAC3;PTK2B;PAK4;MAP2K6;APOBEC3C;JUN;APOBEC3F;MAP2K2;LIMK1;AP1B1;TAP2;TAP1;TRAF2;FOS;BST2;NFKBIA;GNB1;CDK1;BAX;CALM3;TAB2;CALR;APOBEC3A;MYD88;APOBEC3B
KEGG_2021_Human	Kaposi sarcoma-associated herpesvirus infection	32/193	4.51662e-05	0.00135951	0	0	2.35594	23.5716	RB1;CDKN1A;SRC;PIK3R2;ZFP36;TBK1;UBC;E2F1;EP300;E2F2;JAK2;IKBKE;MICA;MICB;MAP2K6;TCF7L2;JUN;TCF7L1;MAP2K2;STAT1;STAT2;EIF2AK2;TRAF2;FOS;TICAM1;VEGFA;NFKBIA;GNB1;IRF7;BAX;CALM3;IRF9
KEGG_2021_Human	B cell receptor signaling pathway	18/81	4.59293e-05	0.00135951	0	0	3.37418	33.7027	LILRA6;IFITM1;JUN;MAP2K2;INPPL1;PIK3R2;LILRB1;FOS;LILRB2;LILRB4;VAV2;NFKBIA;RAC2;BTK;RAC3;SOS1;NFKBIE;PIK3AP1
KEGG_2021_Human	Measles	25/139	7.79854e-05	0.00209852	0	0	2.59432	24.5397	PIK3R2;ADAR;IFIH1;TBK1;IRAK1;IKBKE;JUN;DDX58;STAT1;MX2;STAT2;MX1;EIF2AK2;HSPA2;FOS;NFKBIA;OAS1;OAS2;OAS3;IRF7;BAX;TAB2;TLR7;MYD88;IRF9
KEGG_2021_Human	Human T-cell leukemia virus 1 infection	34/219	0.000103053	0.00254199	0	0	2.17842	19.9984	RB1;VAC14;CDKN1A;SPI1;ATF6B;ADCY4;BUB1B;PIK3R2;ITGAL;ADCY7;RELB;CDC20;CCNB2;ZFP36;PTTG1;CDC27;CHEK1;CREB3L2;E2F1;EP300;E2F2;IL15RA;JUN;MAP2K2;TGFB1;FOS;NFKBIA;CCNA2;CCNA1;ADCY9;ESPL1;BAX;CALR;LTBR
KEGG_2021_Human	Osteoclast differentiation	23/127	0.000133103	0.00303065	0	0	2.61432	23.3312	LILRA6;JUN;SPI1;TGFB1;STAT1;STAT2;CYBA;PIK3R2;TRAF2;LILRB1;FOS;LILRB2;LILRB4;RELB;NFKBIA;TYROBP;BTK;FOSB;TAB2;LCP2;JUNB;IRF9;MAP2K6
KEGG_2021_Human	Yersinia infection	24/137	0.000163883	0.00346495	0	0	2.5111	21.8877	IL10;JUN;MAP2K2;SRC;LIMK1;PIK3R2;TRAF2;FOS;TICAM1;VAV2;NFKBIA;TBK1;IRAK1;RAC2;RAC3;CCL2;PTK2B;TAB2;LCP2;PKN1;DOCK1;MYD88;MAP2K6;ARF6
KEGG_2021_Human	Cellular senescence	26/156	0.000206289	0.00407076	0	0	2.36548	20.074	RB1;CDKN1A;SERPINE1;PIK3R2;CCNB2;RRAS;CHEK1;CAPN2;E2F1;E2F2;MYBL2;CAPN1;NBN;E2F4;MAP2K6;MAP2K2;TGFB1;GADD45B;CDC25A;GADD45G;CCNA2;CCNA1;TRPV4;CDK1;CALM3;RAD9A
KEGG_2021_Human	Pancreatic cancer	16/76	0.000233112	0.00415649	0	0	3.14571	26.3107	RB1;CDKN1A;TGFB1;GADD45B;STAT1;PIK3R2;BRCA2;GADD45G;VEGFA;RAD51;ERBB2;RAC2;E2F1;RAC3;E2F2;BAX
KEGG_2021_Human	Bladder cancer	1941-11-01	0.000238717	0.00415649	0	0	4.31854	36.0177	RB1;CDKN1A;MAP2K2;SRC;ERBB2;E2F1;E2F2;MMP9;UPK3A;TYMP;VEGFA
KEGG_2021_Human	Salmonella infection	36/249	0.000280027	0.00460489	0	0	2.00288	16.3848	CYFIP1;ARF1;DCTN1;FHOD1;STX10;TUBA1B;RRAS;IRAK1;CASP5;KIF5B;TNFSF10;FLNA;RILP;MAP2K6;TCF7L2;JUN;TCF7L1;MAP2K2;RIPK3;EXOC7;TRAF2;FOS;TUBB4B;NFKBIA;TUBB2A;ABI1;PLEKHM1;PLEKHM2;TAB3;BAX;TAB2;PKN1;DYNLRB1;ARL8A;MYD88;ARF6
KEGG_2021_Human	Human cytomegalovirus infection	32/225	0.00078965	0.0123019	0	0	1.96188	14.0155	RB1;CDKN1A;ATF6B;SRC;ADCY4;PIK3R2;ADCY7;GNAI2;TBK1;GNA11;CREB3L2;RAC2;E2F1;RAC3;CCL2;E2F2;PTK2B;MAP2K6;ARHGEF11;MAP2K2;TAP2;TAP1;TRAF2;VEGFA;NFKBIA;PLCB3;ADCY9;GNB1;BAX;CALM3;CALR;SOS1
KEGG_2021_Human	Chagas disease	18/102	0.000940689	0.0138547	0	0	2.52774	17.6156	IL10;C1QB;C1QA;JUN;TGFB1;SERPINE1;PIK3R2;FOS;TICAM1;GNAI2;NFKBIA;PLCB3;IRAK1;GNA11;CCL2;CALR;MYD88;C1QC

## Sheet: Reactome_pathways
Gene_set	Term	Overlap	P-value	Adjusted P-value	Old P-value	Old Adjusted P-value	Odds Ratio	Combined Score	Genes
Reactome_2022	Interferon Signaling R-HSA-913531	51/200	2.75163e-14	4.04765e-11	0	0	4.11053	128.347	IFITM3;IFITM1;IFIT5;UBE2L6;ADAR;IFI35;IFI30;IFIT1;IFIT3;IFIT2;OASL;HERC5;MT2A;TRIM5;NUP62;TRIM26;JAK2;TRIM21;TRIM22;GBP6;RSAD2;PRKCD;IFI27;OAS1;OAS2;OAS3;IRF7;TRIM14;IRF5;IRF9;SP100;UBA7;IFI6;USP18;UBC;FLNA;GBP1;GBP4;STAT1;STAT2;MX2;MX1;EIF2AK2;ISG15;PML;BST2;ISG20;TRIM38;XAF1;EIF4G3;EIF4G1
Reactome_2022	Immune System R-HSA-168256	242/1943	8.19027e-14	6.02394e-11	0	0	1.78783	53.873	IFITM3;PGLYRP4;CYFIP1;IFITM1;IL1RN;CCNF;IFIT5;UBE2L6;ICAM5;IFI35;IFIT1;IFI30;IFIT3;IFIT2;CDC20;HERC5;MT2A;TBK1;CDC27;DHX58;AP1S1;TRIM26;FBXO6;LGALS9;TRIM21;TRIM22;HERC6;GBP6;MEF2A;IL15RA;RSAD2;PRKCE;PRKCD;AP1B1;RNASE2;RNASE1;IFI27;BTK;TRIM14;SERPING1;RBCK1;CFB;PIK3R2;PLAC8;TRPM2;RNF213;CYB5R3;PSMF1;ELANE;SEC31A;CTSA;SIGLEC16;JUN;SIGLEC14;JUP;TNFSF15;TREX1;LIF;EIF2AK2;NBEAL2;PILRA;SMARCA4;BST2;TCN…
Reactome_2022	Interferon Alpha/Beta Signaling R-HSA-909733	27/72	1.78756e-12	8.765e-10	0	0	7.13402	192.977	IFITM3;IFITM1;IFIT5;IFI6;ADAR;IFI35;IFIT1;USP18;IFIT3;IFIT2;OASL;RSAD2;STAT1;MX2;STAT2;MX1;ISG15;BST2;ISG20;IFI27;OAS1;OAS2;OAS3;IRF7;IRF5;XAF1;IRF9
Reactome_2022	Cell Cycle R-HSA-1640170	96/654	1.68432e-09	6.19409e-07	0	0	2.08141	42.0484	RB1;TOP2A;CDKN1A;DSCC1;CEP164;HJURP;BUB1B;MCM10;BRCA1;BRCA2;CDC20;TUBA1B;PTTG1;EXO1;CDC27;CHEK1;NUP62;EP300;NEK2;MYBL2;TK1;JAK2;GTSE1;POLE;RAB8A;ZNF385A;PIAS4;RMI2;CEP131;KIF23;VRK2;ESCO2;TUBG1;SIRT2;CDC25A;CCNA2;CCNA1;MAU2;TUBB2A;ESPL1;GORASP1;BIRC5;MCM4;TERF2IP;MCM5;MCPH1;SRC;RRAD;DCTN1;CDCA5;CDCA8;NCAPG;HMMR;PKMYT1;TYMS;CENPA;NCAPH;SKA1;PSMB10;CCNB2;CDC45;POLR2A;POLD1;UBC;E2F1;POLR2E;RBBP8;E2F…
Reactome_2022	Cytokine Signaling In Immune System R-HSA-1280215	96/702	6.10204e-08	1.52397e-05	0	0	1.91139	31.7522	IFITM3;CDKN1A;IFITM1;IL1RN;IFIT5;INPPL1;UBE2L6;ADAR;PTPN23;IFI35;IFI30;IFIT1;IFIT3;EDA2R;TNFSF13B;IFIT2;OASL;HERC5;MT2A;TBK1;TRIM5;NKIRAS2;NUP62;TRIM26;TIMP1;LGALS9;JAK2;TRIM21;TRIM22;GBP6;MEF2A;IL10;IL15RA;RSAD2;PRKCD;FOS;MMP9;IFI27;OAS1;OAS2;OAS3;RAPGEF1;IRF7;BIRC5;TRIM14;IRF5;SOS1;IRF9;SP100;UBA7;IFI6;PIK3R2;USP18;PSMB10;RELB;RAP1B;MAPK7;IRAK1;IRAK2;UBC;FLNA;CCL2;PTK2B;CSK;PSMF1;IL12RB1;GBP1;G…
Reactome_2022	Cell Cycle, Mitotic R-HSA-69278	77/523	6.21605e-08	1.52397e-05	0	0	2.0751	34.4332	RB1;TOP2A;CDKN1A;CEP164;BUB1B;MCM10;CDC20;TUBA1B;PTTG1;CDC27;NUP62;EP300;NEK2;MYBL2;TK1;JAK2;GTSE1;POLE;RAB8A;CEP131;KIF23;VRK2;ESCO2;TUBG1;SIRT2;CDC25A;CCNA2;CCNA1;MAU2;TUBB2A;ESPL1;GORASP1;BIRC5;MCM4;MCM5;MCPH1;SRC;DCTN1;CDCA5;CDCA8;NCAPG;HMMR;PKMYT1;TYMS;CENPA;NCAPH;SKA1;PSMB10;CCNB2;CDC45;POLD1;UBC;E2F1;E2F2;PSMF1;E2F4;BUB1;PLK4;CDT1;GINS2;CDK11A;RRM2;NCAPH2;PLK1;PTK6;CDC6;TUBB4B;NDC80;ZWINT;…
Reactome_2022	Interferon Gamma Signaling R-HSA-877300	23/89	2.50834e-07	5.2711e-05	0	0	4.12808	62.7406	GBP6;SP100;STAT1;PRKCD;IFI30;PML;OASL;MT2A;OAS1;TRIM5;OAS2;OAS3;IRF7;TRIM14;TRIM26;IRF5;TRIM38;JAK2;TRIM21;GBP1;TRIM22;IRF9;GBP4
Reactome_2022	Innate Immune System R-HSA-168249	126/1035	4.58636e-07	8.43318e-05	0	0	1.67812	24.4922	FCN1;PGLYRP4;CYFIP1;FCN2;DEFB1;UBE2L6;SRP14;HERC5;TBK1;DHX58;TOM1;EP300;CAPN1;OSTF1;TRIM21;CD177;MEF2A;ZBP1;PRKCE;PRKCD;CYBA;ATP11A;RNASE2;TICAM1;RNASE1;DOK3;TYROBP;BTK;SPNS1;SERPING1;CD300E;ARL8A;CFB;S100A7;UBA7;PIK3R2;GPR84;PLD3;RAP1B;PLAC8;TRPM2;CYB5R3;DPP7;IRAK1;IRAK2;UBC;PSMF1;RAB6A;ELANE;MAP2K6;CTSA;SIGLEC16;JUN;SIGLEC14;JUP;TREX1;IDH1;MUC19;NBEAL2;ISG15;DNAJC13;BST2;NFKBIA;NAT8;TCN1;TAB3;T…
Reactome_2022	Signaling By Rho GTPases, Miro GTPases And RHOBTB3 R-HSA-9716542	86/660	2.28423e-06	0.000373345	0	0	1.79882	23.3657	ARHGAP11A;DOCK6;CYFIP1;ARHGAP11B;DOCK4;KIF14;BUB1B;ARHGEF10L;CDC20;TUBA1B;ARHGDIA;KIF5B;MPZ;EPSTI1;EFHD2;RAC2;ANKFY1;GIT1;ARHGEF11;PLEKHG2;TPM3;NCOA3;PRKCD;ARAP2;CYBA;VRK2;RNASE1;SRRM1;VAV2;SENP1;WDR81;CDC42EP3;SPATA13;RAPGEF1;BTK;KCTD13;PLIN3;BIRC5;ARHGEF2;SOS1;DOCK1;LLGL1;DBN1;SRC;CDCA8;PIK3R2;ARHGAP17;SLC1A5;TRAK1;IQGAP3;CENPA;SKA1;RHOBTB2;ABR;SH3BP1;DVL2;FLNA;DVL3;PTK2B;CSK;RBBP6;SRGAP2;WASF1…
Reactome_2022	RHO GTPase Cycle R-HSA-9012999	63/441	2.73267e-06	0.000377482	0	0	1.99216	25.5201	ARHGAP11A;DOCK6;CYFIP1;ARHGAP11B;DOCK4;KIF14;ARHGEF10L;TUBA1B;ARHGDIA;MPZ;EPSTI1;EFHD2;RAC2;ANKFY1;GIT1;ARHGEF11;PLEKHG2;TPM3;NCOA3;ARAP2;CYBA;VRK2;RNASE1;SRRM1;VAV2;SENP1;WDR81;CDC42EP3;SPATA13;RAPGEF1;KCTD13;ARHGEF2;SOS1;DOCK1;DBN1;SRC;PIK3R2;ARHGAP17;SLC1A5;IQGAP3;RHOBTB2;ABR;SH3BP1;PTK2B;CSK;RBBP6;SRGAP2;WASF1;PAK4;PRPF38B;JUP;CDC42BPB;ARHGAP27;ARHGAP23;ARHGAP33;ANLN;ARHGAP31;DIAPH2;DIAPH3;FM…
Reactome_2022	Signaling By Rho GTPases R-HSA-194315	84/644	2.87518e-06	0.000377482	0	0	1.7999	22.9656	ARHGAP11A;DOCK6;CYFIP1;ARHGAP11B;DOCK4;KIF14;BUB1B;ARHGEF10L;CDC20;TUBA1B;ARHGDIA;KIF5B;MPZ;EPSTI1;EFHD2;RAC2;ANKFY1;GIT1;ARHGEF11;PLEKHG2;TPM3;NCOA3;PRKCD;ARAP2;CYBA;VRK2;RNASE1;SRRM1;VAV2;SENP1;WDR81;CDC42EP3;SPATA13;RAPGEF1;BTK;KCTD13;BIRC5;ARHGEF2;SOS1;DOCK1;LLGL1;DBN1;SRC;CDCA8;PIK3R2;ARHGAP17;SLC1A5;IQGAP3;CENPA;SKA1;RHOBTB2;ABR;SH3BP1;DVL2;FLNA;DVL3;PTK2B;CSK;RBBP6;SRGAP2;WASF1;BUB1;PAK4;P…
Reactome_2022	RAC1 GTPase Cycle R-HSA-9013149	33/178	3.07939e-06	0.000377482	0	0	2.70177	34.2876	DOCK6;CYFIP1;DOCK4;ARHGAP17;PIK3R2;SLC1A5;IQGAP3;ABR;SH3BP1;ARHGDIA;MPZ;SRGAP2;WASF1;GIT1;PAK4;ARHGEF11;PLEKHG2;ARAP2;CYBA;VRK2;ARHGAP27;RNASE1;ARHGAP23;VAV2;ARHGAP33;ARHGAP31;DIAPH3;TAOK3;SPATA13;ABI1;PKN1;SOS1;DOCK1
Reactome_2022	G1/S-Specific Transcription R-HSA-69205	2025-11-29	6.29986e-06	0.000712853	0	0	7.20227	86.2471	CDT1;CCNA1;CDC45;RRM2;E2F1;CDK1;E2F4;TK1;CDC6;TYMS;CDC25A
Reactome_2022	Mitotic G1 Phase And G1/S Transition R-HSA-453279	28/147	9.90335e-06	0.00104056	0	0	2.7882	32.1274	RB1;TOP2A;CDKN1A;SRC;MCM10;TYMS;PSMB10;CDC45;UBC;E2F1;E2F2;MYBL2;PSMF1;TK1;E2F4;JAK2;POLE;CDT1;RRM2;PTK6;CDC6;CDC25A;CCNA2;CCNA1;RPA4;CDK1;MCM4;MCM5
Reactome_2022	TP53 Regulates Transcription Of Cell Cycle Genes R-HSA-6791312	14/49	1.59924e-05	0.00156832	0	0	4.71892	52.1129	CDKN1A;CCNA2;CNOT4;CCNA1;CARM1;CNOT3;E2F1;CDK1;EP300;BAX;E2F4;ZNF385A;E2F7;E2F8
Reactome_2022	Antiviral Mechanism By IFN-stimulated Genes R-HSA-1169410	19/83	1.827e-05	0.0016797	0	0	3.50805	38.2738	UBA7;STAT1;MX2;MX1;EIF2AK2;UBE2L6;ISG15;IFIT1;USP18;OASL;HERC5;OAS1;OAS2;OAS3;NUP62;UBC;FLNA;EIF4G3;EIF4G1
Reactome_2022	TP53 Regulates Transcription Of Genes Involved In G1 Cell Cycle Arrest R-HSA-6804116	2025-07-14	3.8459e-05	0.00318326	0	0	11.7625	119.576	CCNA2;CCNA1;CDKN1A;E2F1;E2F7;ZNF385A;E2F8
Reactome_2022	Cell Cycle Checkpoints R-HSA-69620	41/271	3.89522e-05	0.00318326	0	0	2.11737	21.498	CDKN1A;RRAD;CDCA8;BUB1B;MCM10;BRCA1;PKMYT1;CENPA;SKA1;PSMB10;CDC20;CCNB2;CDC45;EXO1;CDC27;CHEK1;UBC;RBBP8;PSMF1;CLSPN;GTSE1;BUB1;ZNF385A;PIAS4;RMI2;PLK1;CDC6;ZWINT;CDC25A;NDC80;CCNA2;CENPE;CCNA1;CENPF;UBE2S;CDK1;BIRC5;MCM4;MCM5;SPC25;RAD9A
Reactome_2022	HDR Thru Homologous Recombination (HRR) R-HSA-5685942	16/67	4.74436e-05	0.00367313	0	0	3.70265	36.8634	RMI2;RRAD;XRCC2;BRCA1;BRCA2;SLX4;RAD51;EME1;EME2;EXO1;POLD1;CHEK1;UBC;RBBP8;POLE;RAD9A
Reactome_2022	Neutrophil Degranulation R-HSA-6798695	61/468	6.54855e-05	0.00481646	0	0	1.78623	17.208	FCN1;CYFIP1;TNFAIP6;CTSZ;ITGAL;SRP14;TOM1;CAPN1;OSTF1;SNAP29;CTSD;CD177;PRKCD;CYBA;ATP11A;RNASE2;MMP8;RNASE1;MMP9;FGR;CEACAM1;PKM;DOK3;TYROBP;BPI;PLEKHO2;ATP6V0C;ARL8A;S100A7;DNASE1L1;LILRA6;CSTB;GRN;GPR84;AGPAT2;PLAC8;RAP1B;CST3;TRPM2;CYB5R3;DPP7;RAB6A;ELANE;CTSA;SIGLEC14;JUP;IDH1;NBEAL2;DNAJC13;LILRB2;TUBB4B;RAB10;BST2;GALNS;PFKL;TSPAN14;NAT8;TCN1;MAN2B1;CD68;SIGLEC5
