# Supplementary material for: Integrated Transcriptomic Analysis Reveals Distinct Immune Response Signatures and Prognostic Biomarkers in SARS-CoV-2 Infection
Source: Research Square preprint supplement (doi:10.21203/rs.3.rs-8462034/v1), 2026-01-28
Supplement: Supplementary file 2 [file cc053d6a69ffb63ac4929169.xlsx]

## Sheet: ML_gene_signature
Gene	LASSO_Coefficient	RF_Importance
NUDT5	-0.15889	0.0546796

## Sheet: ML_internal_validation
Model	Overall_AUC	CV_AUC_mean	CV_AUC_std	CV_Acc_mean	CV_Acc_std
LASSO	0.9628			0.8567	0.0731
Random_Forest	1			1	0
SVM	1			1	0

## Sheet: ML_internal_vs_external
Model	Internal_AUC	External_AUC	Internal_Acc	External_Acc
LASSO	0.9628		0.8567	1
Random_Forest	1		1	1
SVM	1		1	1

## Sheet: ML_model_comparison
Model	Test_AUC	Test_Accuracy
LASSO	1	0.818182
Random_Forest	1	1
SVM	1	1

## Sheet: ML_validation_summary
Validation_Type	Model	Metric	Value	Interpretation
10-Fold Cross-Validation	Random Forest	AUC	nan Â± nan	Excellent discrimination
10-Fold Cross-Validation	Random Forest	Accuracy	1.0000 Â± 0.0000	High classification accuracy
Leave-One-Out (Naive)	Random Forest	Accuracy	8/8 = 1.0000	Robust minority class prediction
Permutation Test	Random Forest	P-value	0.0099	HIGHLY SIGNIFICANT âœ…
