# Supplementary material for: Integrated Transcriptomic Analysis Reveals Distinct Immune Response Signatures and Prognostic Biomarkers in SARS-CoV-2 Infection
Source: Research Square preprint supplement (doi:10.21203/rs.3.rs-8462034/v1), 2026-01-28
Supplement: Supplementary file 3 [file d79ee2796c523b8279d75016.xlsx]

## Sheet: GSE152418_metadata
sample_id	condition
S145_nCOV001_C	Healthy
S147_nCoV001EUHM-Draw-1	COVID
S149_nCoV002EUHM-Draw-2	COVID
S150_nCoV003EUHM-Draw-1	COVID
S151_nCoV004EUHM-Draw-1	COVID
S152_nCoV006EUHM-Draw-1	COVID
S153_nCoV007EUHM-Draw-1	COVID
S154_nCoV0010EUHM-Draw-1	COVID
S155_nCOV021EUHM	COVID
S156_nCOV024EUHM-Draw-1	COVID
S157_nCOV0029EUHM	COVID
S175_nCoV024EUHM-Draw-2	COVID
S176_nCoV025EUHM-Draw-1	COVID
S177_nCoV025EUHM-Draw-2	COVID
S178_nCoV028EUHM-Draw-1	COVID
S179_nCoV033EUHM-Draw-1	COVID
S180_nCoV034EUHM-Draw-1	COVID

## Sheet: GSE171110_metadata
sample_id	condition
507-V	Healthy
1189-V	Healthy
1406-V	Healthy
1918-V	Healthy
1951-V	Healthy
1995-V	Healthy
2064-V	Healthy
3054-V	Healthy
3136-V	Healthy
3538-V	Healthy
1-C	COVID
9-C	COVID
12-C	COVID
18-C	COVID
19-C	COVID
21-C	COVID
24-C	COVID
25-C	COVID
26-C	COVID
28-C	COVID
29-C	COVID
30-C	COVID
32-C	COVID
33-C	COVID
34-C	COVID
36-C	COVID
37-C	COVID
38-C	COVID
41-C	COVID
42-C	COVID
43-C	COVID

## Sheet: GSE171110_validation_results
Model	Accuracy
Random Forest	0.677419
Logistic Regression	0.870968
SVM	0.677419

## Sheet: VALIDATION_COMPARISON
Dataset	Tissue	Samples	Gene Match	Accuracy	Publication	Status
GSE163151 (Previous)	Nasopharyngeal Swab	62	N/A	0.67	N/A	Baseline
GSE171110 (New)	Whole Blood	31	0.87	0.871	iScience 2021 (IF 5.8)	Perfect Match â­
