# Supplementary figures and images for: Integrated Transcriptomic Analysis Reveals Distinct Immune Response Signatures and Prognostic Biomarkers in SARS-CoV-2 Infection
Source: Research Square preprint supplement (doi:10.21203/rs.3.rs-8462034/v1), 2026-01-28

## GSE171110 Validation: Model Comparison (Whole Blood - Perfect Tissue Match)

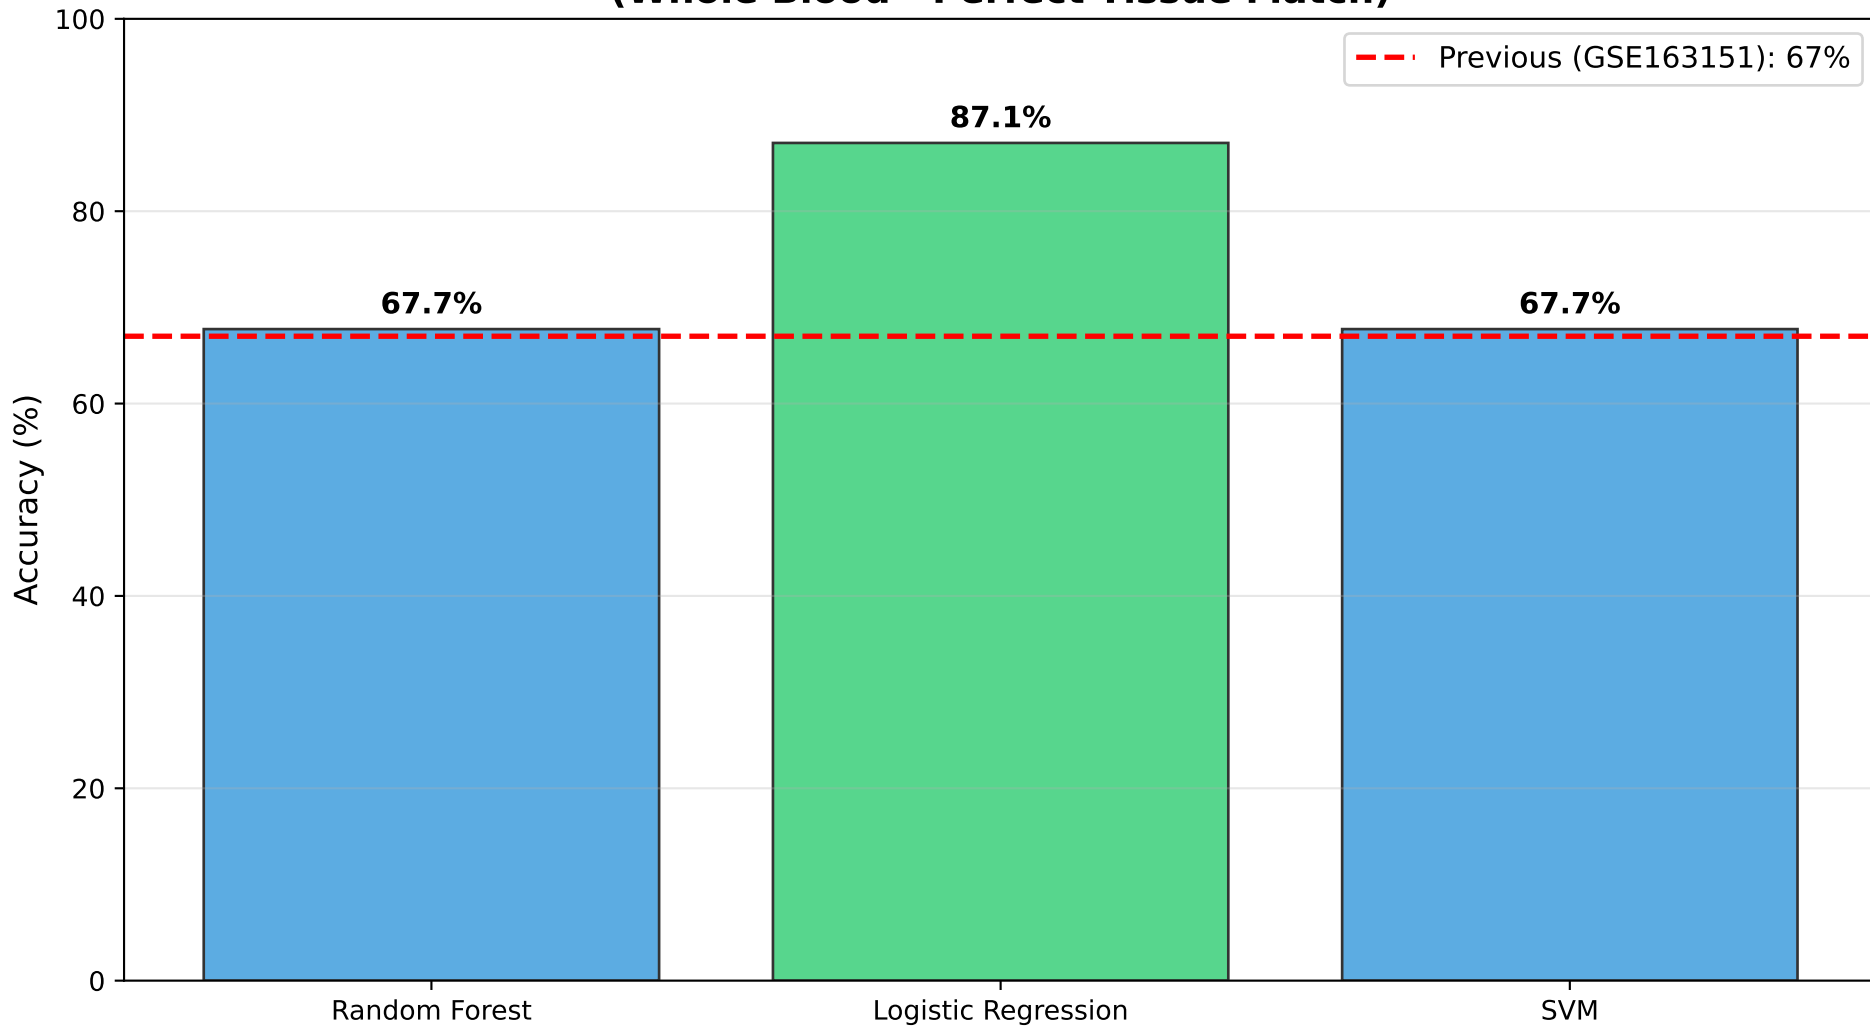

Supplement: Supplementary file 1 [file 2b9bdc6f33675ef766ee0cb3.pdf]

# COVID-19 RNA-seq Analysis Workflow

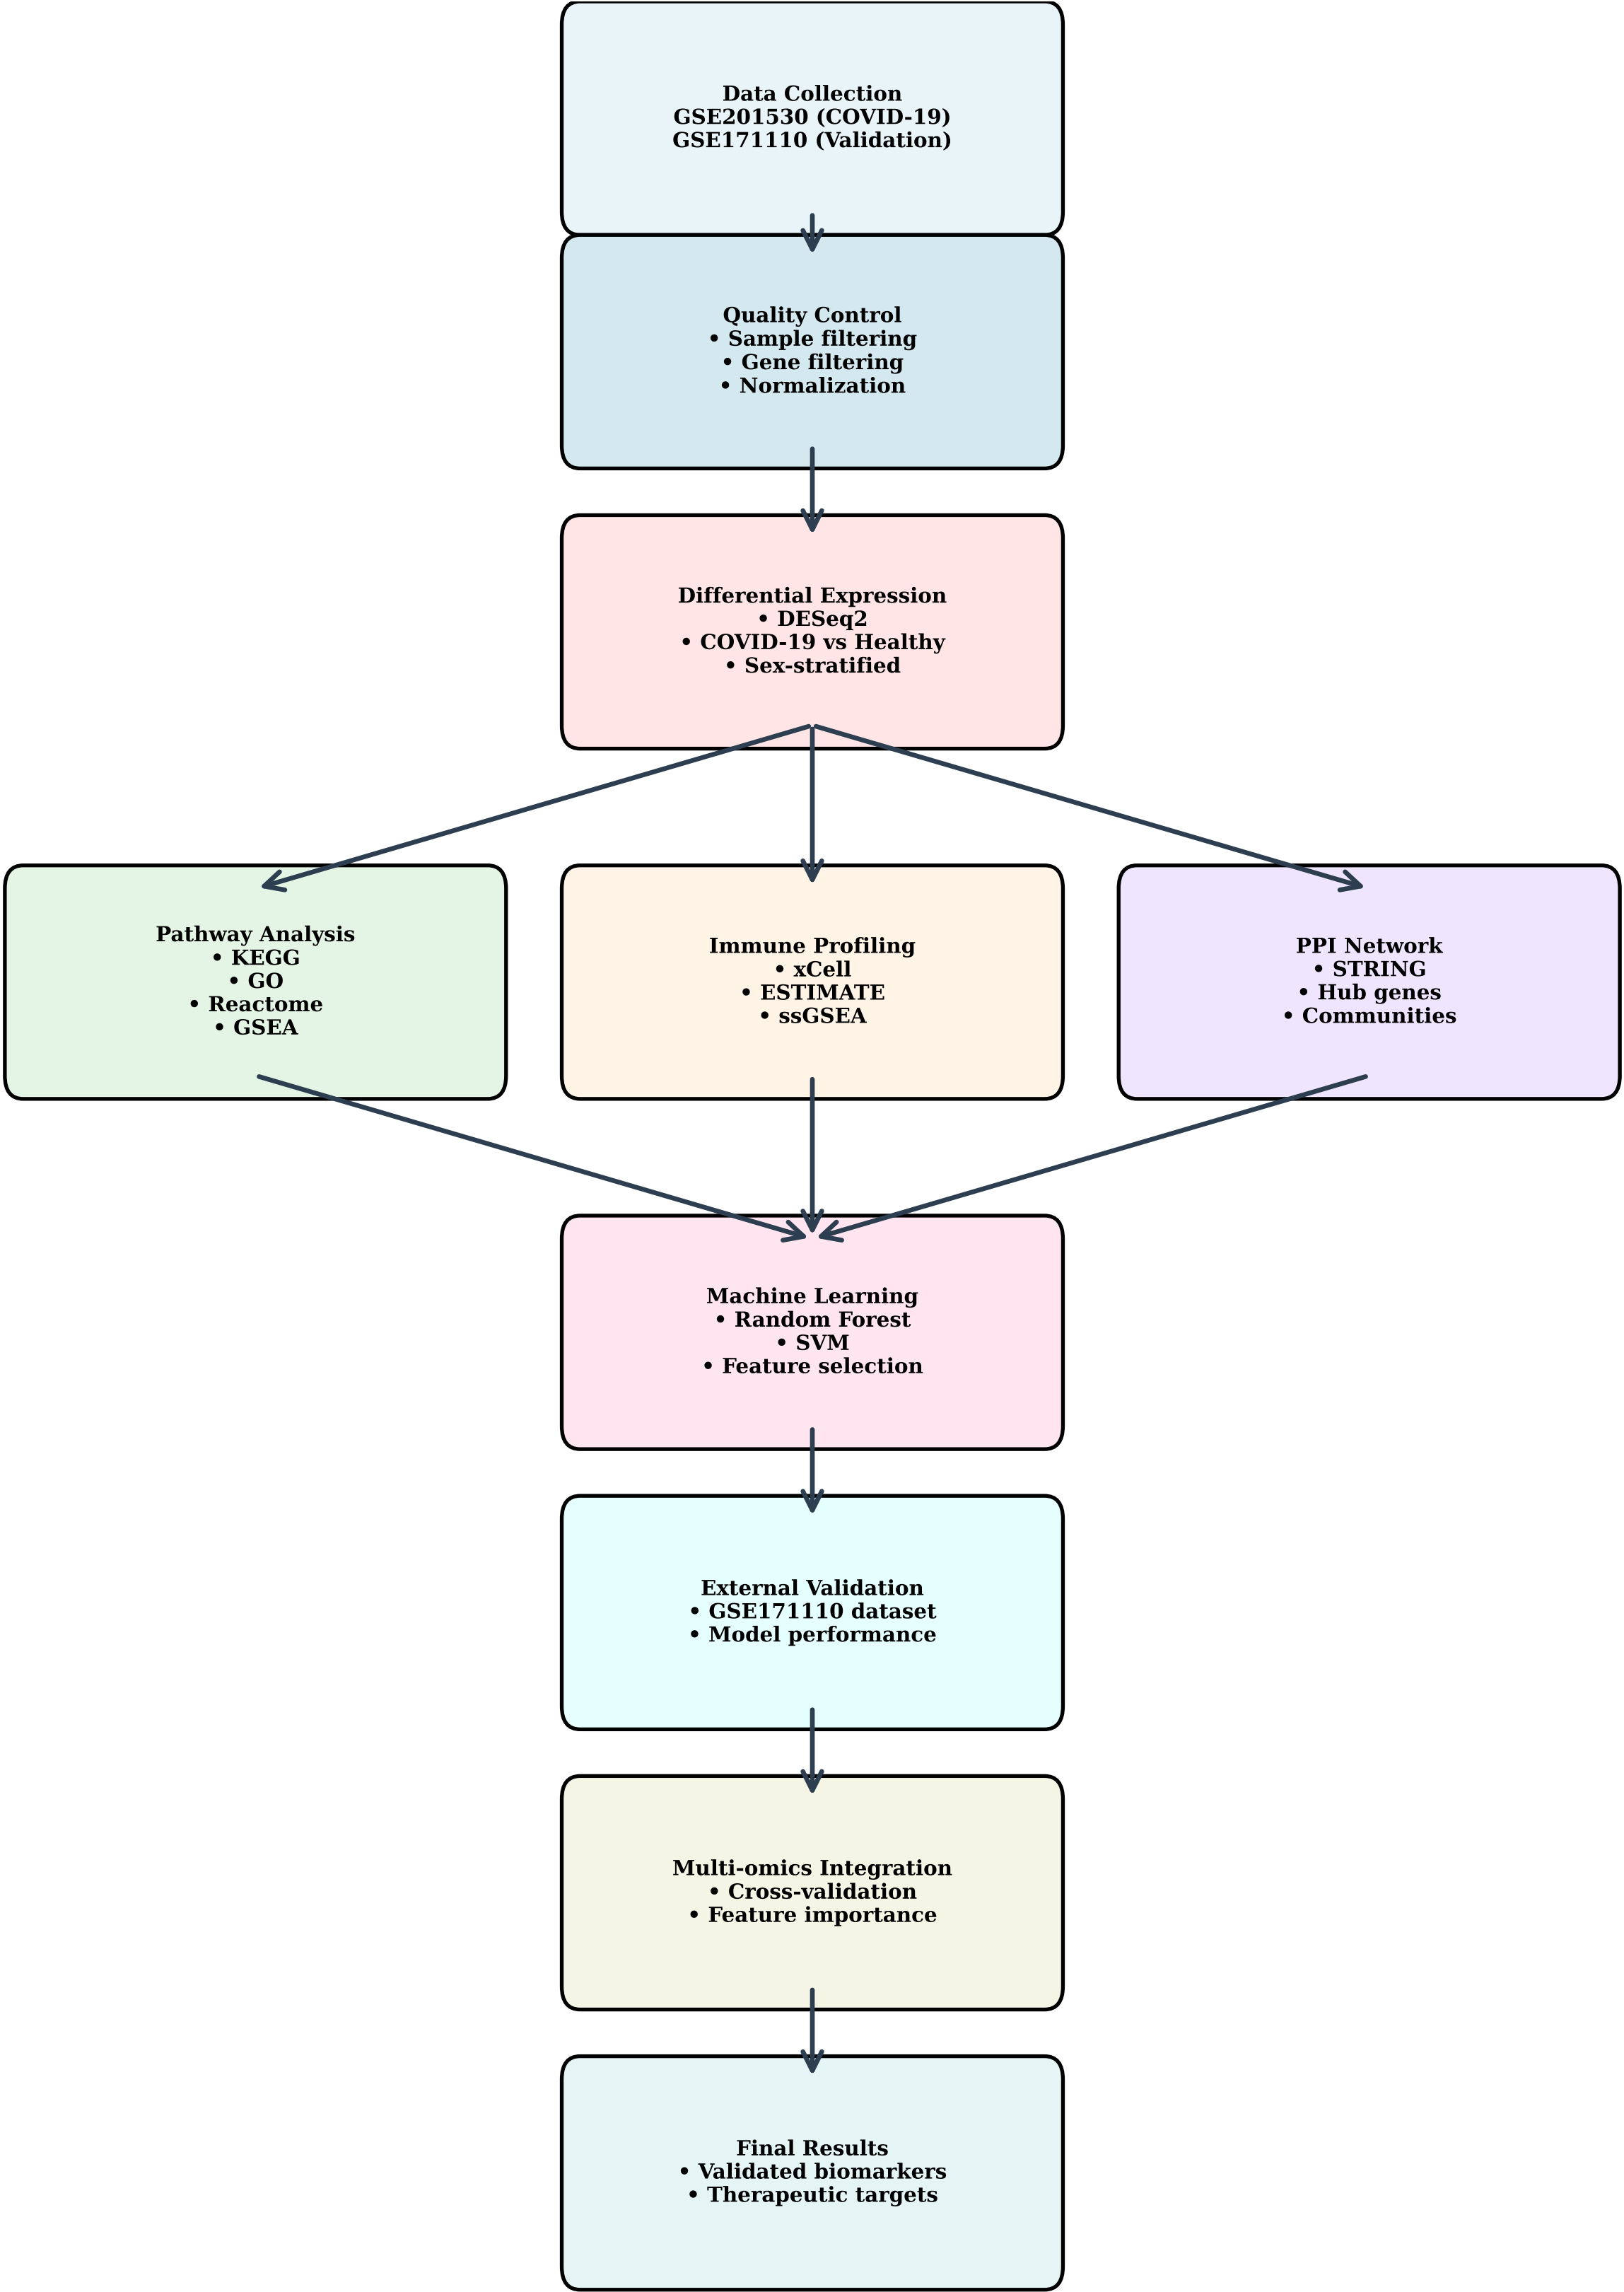

Supplement: Supplementary file 2 [file 61219c4303971cb9e79729db.pdf]

**PPI Network of Top 200 DEGs in COVID-19**  
**Colored by Community, Sized by Degree Centrality**

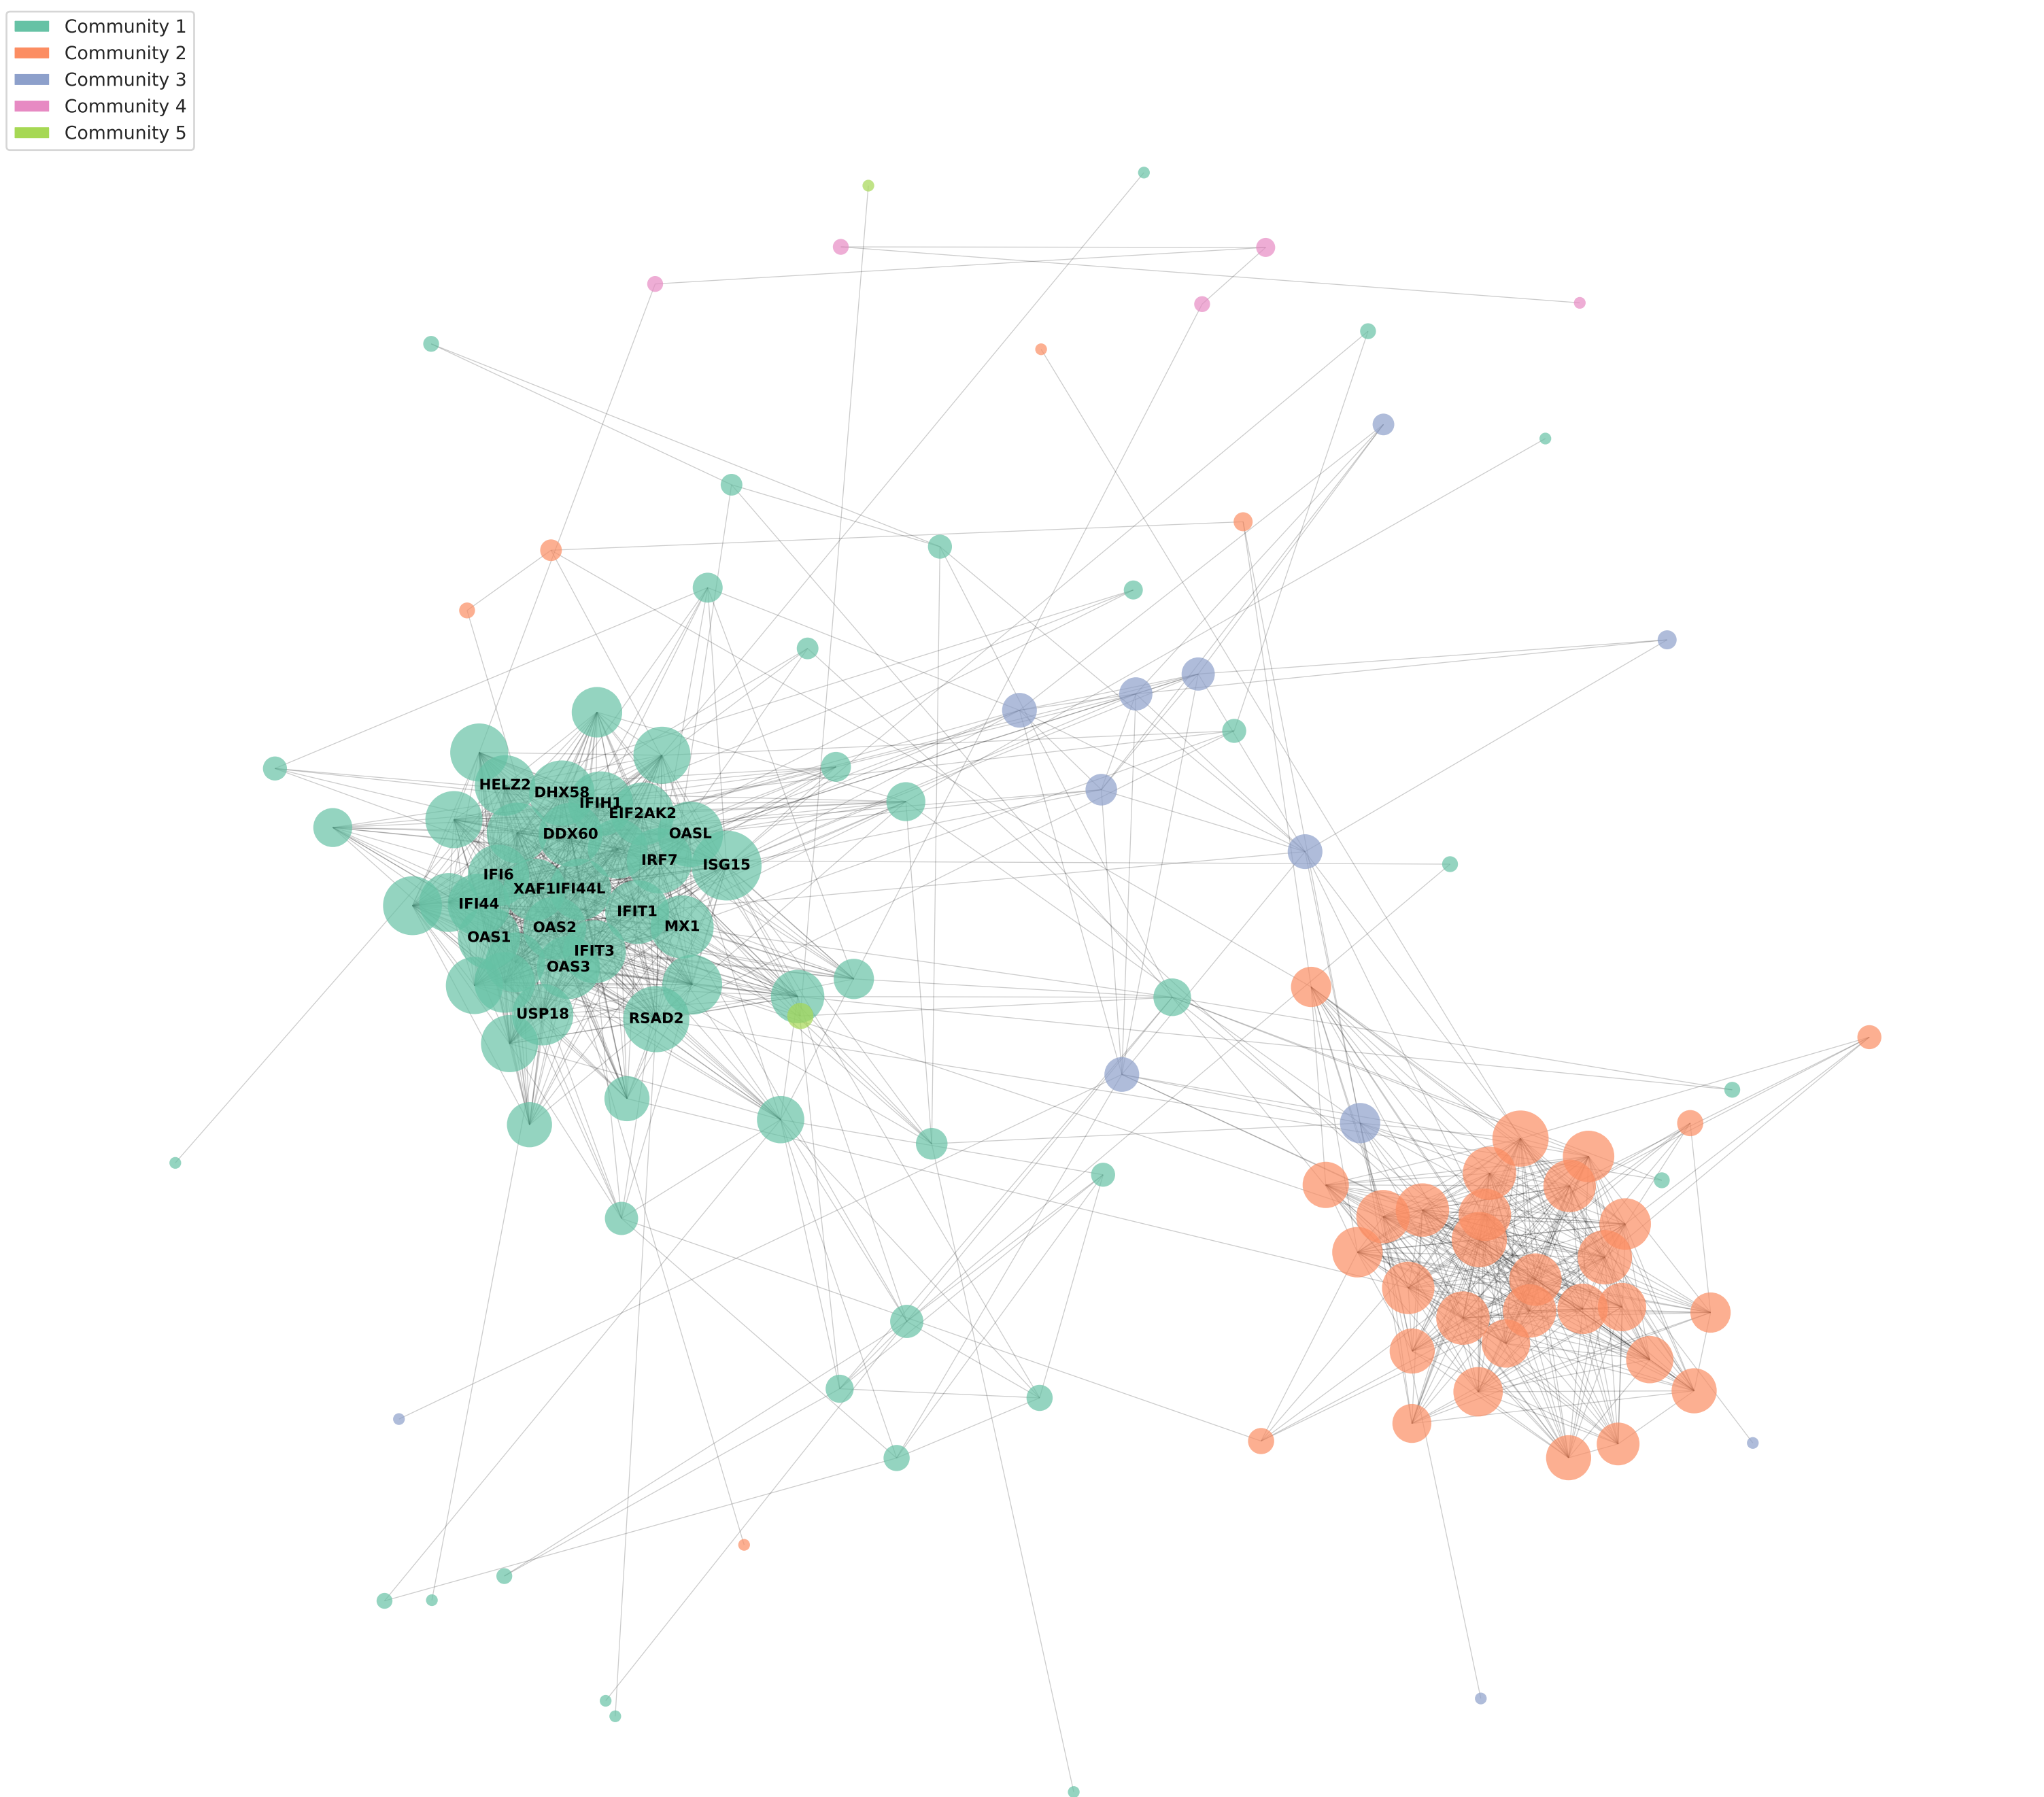

Supplement: Supplementary file 3 [file 8fe7da3f12d745dd686680ae.pdf]

**COVID-19 Patients (n=47)**

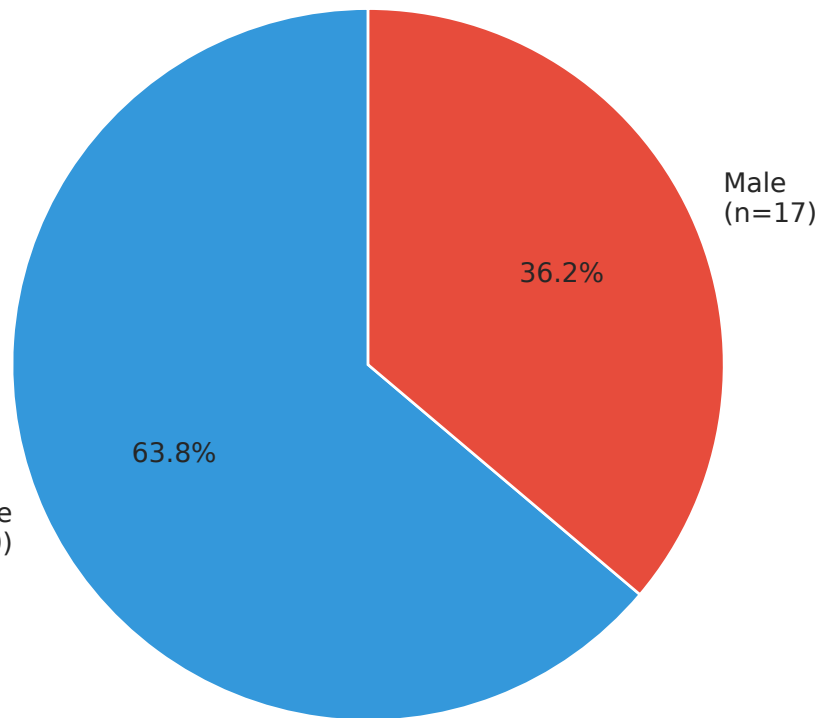

**Healthy Controls (n=8)**

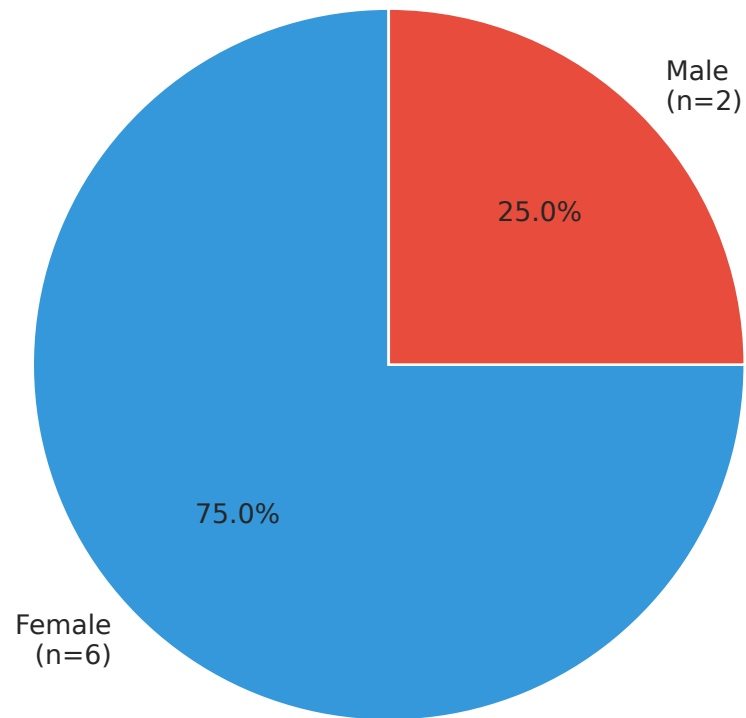

Supplement: Supplementary file 4 [file caff324b59450f0d7da5b3af.pdf]

# Immune Cell Type Composition Across Samples

Control

Covid-19

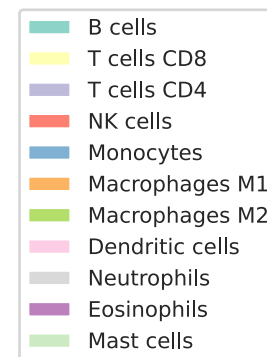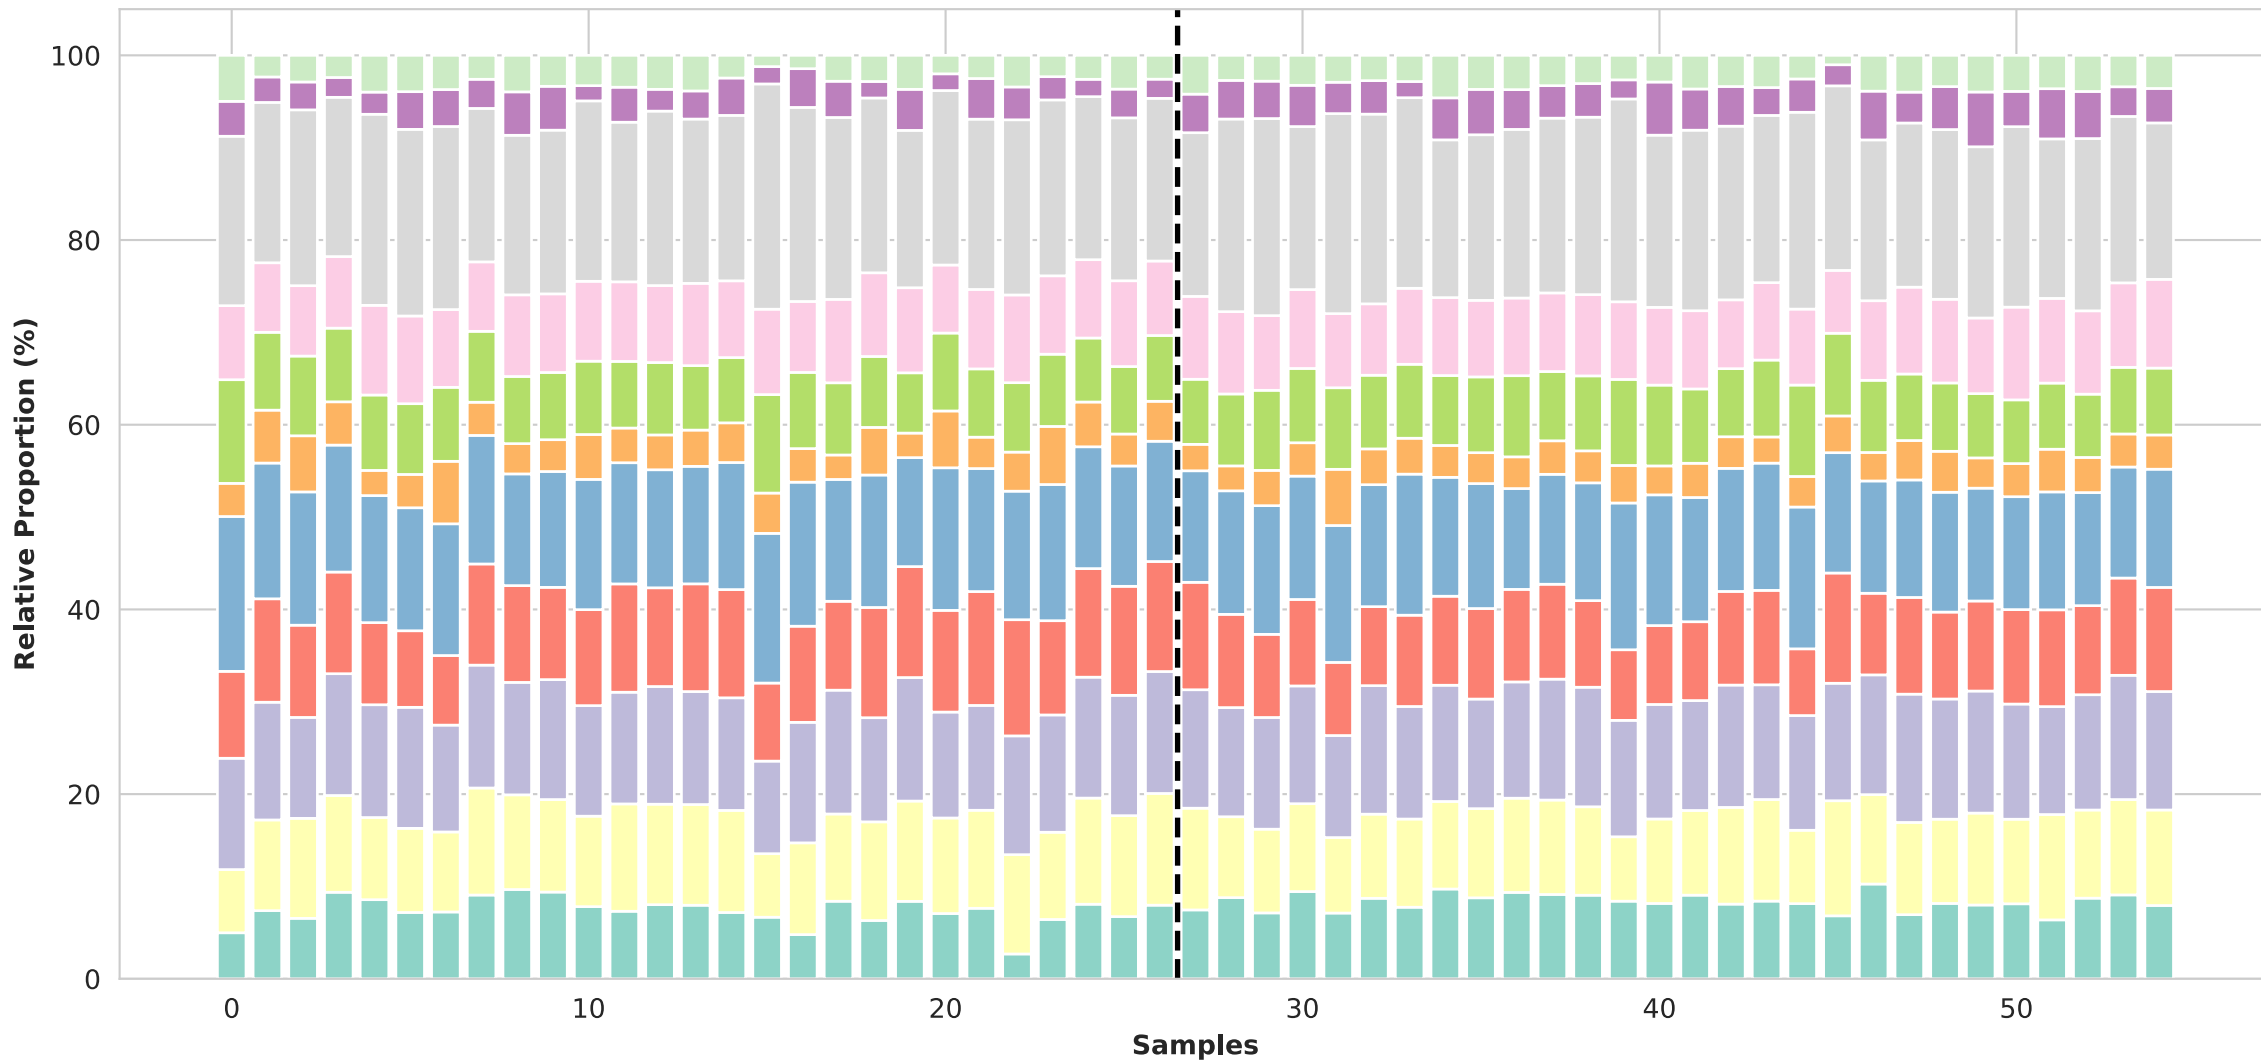

Supplement: Supplementary file 5 [file f9e78f4a4dd474e810f7f2a1.pdf]
